# Supplementary material for: A systematic literature review of game-based approaches in chemistry education (2014–2024)
Source: Royal Society of Chemistry journal article supplement (doi:10.1039/d5rp00248f), 2025-10-28
Supplement: d5rp00248f1.pdf [file d5rp00248f1.pdf]

Appendix: Titles of reviewed studies, including authors, publication years, and variable information

| No | Authors, Years                          | Title                                                                                                                                                                             | Variables                                                     |
|----|-----------------------------------------|-----------------------------------------------------------------------------------------------------------------------------------------------------------------------------------|---------------------------------------------------------------|
| 1  | Chen et al. (2014)                      | Effects of type of exploratory strategy and prior knowledge on middle school students' of chemical formulas from a 3D role-playing game learning                                  | Academic achievement and Motivation                           |
| 2  | Joag (2014)                             | An effective method of introducing the periodic table as a crossword puzzle at the high school level                                                                              | Academic achievement                                          |
| 3  | Martí-Centelles & Rubio-Magnieto (2014) | ChemMend: A card game to introduce and explore the periodic table while engaging students' interest                                                                               | Academic Achievement, Attention                               |
| 4  | Weng et al. (2015)                      | Testing the effect of mnemonic strategy embedded in digital game                                                                                                                  | Academic Achievement and Attitude towards lesson              |
| 5  | Franco-Mariscal et al., (2016)          | A game-based approach to learning the idea of chemical elements and their periodic classification                                                                                 | Academic achievement and Perception for games                 |
| 6  | Hou et al., (2016)                      | Chemistry education board game based on cognitive mechanism: multi-dimensional evaluation of learners' knowledge acquisition, flow and playing experience of board game materials | Academic achievement ,Flow experience                         |
| 7  | Cahyana et al., (2017)                  | Developing and application of mobile game based learning (M-GBL) for high school students performance in chemistry                                                                | Academic achievement                                          |
| 8  | Hennah & Seery, (2017)                  | Using Digital Badges for Developing High School Chemistry Laboratory Skills                                                                                                       | Academic achievement                                          |
| 9  | Hodges et al., (2018)                   | An exploratory study of blending the virtual world and the laboratory experience in secondary chemistry classrooms                                                                | Academic achievement, scientific process skills<br>Engagement |
| 10 | da Silva Júnior et al., (2018)          | Interactive computer game that engages students in reviewing organic compound nomenclature                                                                                        | Academic achievement                                          |
| 11 | Lay & Osman,(2018)                      | Developing 21st Century Chemistry Learning through Designing Digital Games                                                                                                        | Academic Achievement, Motivation, 21st Century Skills         |
| 12 | Sousa Lima et al., (2019)               | Game-based application for helping students review chemical nomenclature in a fun way                                                                                             | Academic achievement                                          |
| 13 | Srisawasdi & Panjaburee(2019)           | Implementation of game-transformed inquiry-based learning to promote understanding of and motivation to learn chemistry                                                           | Academic achievement, Motivation                              |
| 14 | Wang et al.,(2019)                      | Integrating board game elements, collaborative discussion,and mobile technology to a gamification instructional activity - a case of high school chemical course                  | Flow and Engagement                                           |
| 15 | Boesdorfer & Daugherty, (2020)          | Using criteria-based digital badging in high school chemistry unit to improve student learning                                                                                    | Academic achievement and engagement                           |
| 16 | Chen et al.,( 2020)                     | Effects of games on students' emotions of learning science and achievement in chemistry                                                                                           | Academic achievement and Emotions                             |
| 17 | da Silva Junior et al., (2020)          | Time Bomb Game: Design, Implementation, and Evaluation of a Fun and Challenging Game Reviewing the Structural Theory of Organic Compounds                                         | Academic achievement                                          |
| 18 | Fitriyana et al., (2020)                | Android-based-game and blended learning in chemistry: effect on students'self-efficacy and achievement                                                                            | Academic achievement and self efficacy                        |
| 19 | Rahmahani et al., (2020)                | The effect of gamified student response system on students' perception and achievement                                                                                            | Academic achievement, student perveptions                     |
| 20 | Tsai et al., (2020)                     | Element enterprise Tycoon: Playing board games to learn chemistry in daily life                                                                                                   | Academic achievement, engagement                              |
| 21 | Bjørner et al., (2021)                  | Design and Evaluation of a Serious Game to Supplement Pupils' Understanding of Molecular Structures in Chemistry                                                                  | Academic achievement and engagement                           |
| 22 | Chen et al. (2021)                      | The effect of a scientific board game on improving creative problem solving skills                                                                                                | Academic achievement and problem solving skills               |
| 23 | Fitriyana et al. (2021)                 | The Influences of hybrid learning with video conference and "Chemondro-Game" on students' self-efficacy, self-regulated learning, and achievement toward chemistry                | Academic Achievement, self-efficacy, self-regulated learning  |

|    |                                        |                                                                                                                                                                                   |                                                                       |
|----|----------------------------------------|-----------------------------------------------------------------------------------------------------------------------------------------------------------------------------------|-----------------------------------------------------------------------|
| 24 | Lutfi et al. (2021)                    | Chemical bonding successful learning using the “Chebo Collect Game”: A case study                                                                                                 | Academic achievement , Students` activity                             |
| 25 | Achmad Lutfi et al. (2021)             | Applying gamification to improve the quality of teaching and learning of Chemistry in high schools: A case study of Indonesia                                                     | Academic Achievement, Engagement                                      |
| 26 | Zan et al. (2021)                      | The Effect of Arabic-Supported Educational Game on the Success of 9th-Grade Syrian Students in the Symbolic Language of Chemistry: Example of Turkey                              | Academic Achievement                                                  |
| 27 | Li et al.,(2022)                       | CHEMTrans: Playing an Interactive Board Game of Chemical Reaction Aeroplane Chess                                                                                                 | Motivation and Engagement                                             |
| 28 | Nenohai et al., (2022)                 | Development of Gamification-Based Wordwall Game Platform on Reaction Rate Materials                                                                                               | Engagement                                                            |
| 29 | Villamor & Lapinid, (2022)             | The Use of Gamified Differentiated Homework in Teaching General Chemistry                                                                                                         | Academic achievement and motivation                                   |
| 30 | Badajos et al., (2023)                 | Go Carb Deck: A Card Game for Teaching Classification of Simple Monosaccharides                                                                                                   | Academic Achievement, Game experience                                 |
| 31 | Cahyana et al., (2023)                 | Improving Students’ Literacy and Numeracy Using Mobile Game-Based Learning with Augmented Reality in Chemistry and Biology                                                        | Academic Achievement                                                  |
| 32 | Chen et al.,(2023)                     | Design and Development of a Scaffolding-Based Mindtool for Gamified Learning Classrooms                                                                                           | Academic achievement and flow                                         |
| 33 | Giron-Gambero & Franco-Mariscal (2023) | “Atomizados”: An Educational Game for Learning Atomic Structure. A Case Study with Grade-9 Students with Difficulties Learning Chemistry                                          | Academic achievement , motivation and students perceptions            |
| 34 | Hou et al. (2023)                      | Evaluation of a mobile-based scaffolding board game developed by scaffolding-based game editor: analysis of learners’ performance, anxiety and behavior patterns                  | Academic achievement, Learners’ anxiety about chemistry               |
| 35 | Karayel et al., (2023)                 | ZuKon 2030: An Innovative Learning Environment Focused on Sustainable Development Goals                                                                                           | Engagement                                                            |
| 36 | Krug & Huwer, (2023)                   | Safety in the Laboratory—An Exit Game Lab Rally in Chemistry Education                                                                                                            | Motivation                                                            |
| 37 | Lutfi et al., (2023)                   | Gamification: game as a medium for learning chemistry to motivate and increase retention of students’ learning outcomes                                                           | Academic achievement and Motivation                                   |
| 38 | Lutfi & Hidayah, (2023)                | House of Chemistry as a hydrocarbon learning media for high school students                                                                                                       | Academic achievement and Motivation                                   |
| 39 | Manzano-Leon et al.,( 2023)            | Gamification in science Education: Challenging Disengagement in Socially Deprived Communities                                                                                     | Motivation, engagement, and flow                                      |
| 40 | Naumoska et al. (2023)                 | Using the Escape Room game-based approach in chemistry teaching                                                                                                                   | Motivation and engagement                                             |
| 41 | Najib et al. (2024)                    | STEM-PT Traveler, a game-based approach for learning elements of the periodic table: An approach for enhancing secondary school students’ motivation for learning chemistry       | Motivation                                                            |
| 42 | Rusevska et al.,(2024)                 | Innovative Learning Activities for Ethnically Diverse Students in Macedonian Science Education                                                                                    | Motivation, Attitudes towards science                                 |
| 43 | Saithongdee & Sirirat, (2024)          | Learning Mole Calculation through a Board Game in an Engaging and Enjoyable Environment: Design, Implementation, and Evaluation                                                   | Academic Achievement, Attitude towards game                           |
| 44 | Atanan & Saithongdee (2024)            | Computer Game Development for Balancing Chemical Equations Skill in Chemistry Education                                                                                           | Academic Achievement and Engagement                                   |
| 45 | Hu et al., (2024)                      | Timing of information presentation matters: Effects on secondary school students' cognition, motivation and emotion in game-based learning                                        | Motivation and Cognition                                              |
| 46 | Hwang et al., (2024)                   | Comprehending complex chemistry problems in a structured and enjoyable manner: A concept mapping based contextual gaming approach                                                 | Problem-solving tendency, cognitive load and scientific self-efficacy |
| 47 | Irwanto et al., (2024)                 | Exploring high school students’ attitudes towards digital game-based learning: A perspective from Indonesia                                                                       | Engagement and Attitudes Toward Digital Games                         |
| 48 | Rahman et al., (2024)                  | Game-based learning in Metaverse: Virtual chemistry classroom for chemical bonding for remote education                                                                           | Academic achievement, Users’ opinions                                 |
| 49 | Debit et al., (2024)                   | GamesBond: A Game-based supplemental teaching material for ionic and covalent bonding                                                                                             | Academic Achievement and Engagement                                   |
| 50 | Chen et al.,(2024)                     | Effects of escape room game-based civics education on junior high school students' learning motivation, critical thinking and flow experience                                     | Motivation, Critical thinking ability and Flow experience             |
| 51 | Li et al. (2024)                       | Chemistry education board game based on cognitive mechanism: multi-dimensional evaluation of learners’ knowledge acquisition, flow and playing experience of board game materials | Academic achievement, Flow experience                                 |
| 52 | Lhardy & Reina (2024)                  | Identifications: A battle card game to learn chemical tests and practice observation and reasoning                                                                                | Engagement                                                            |
